# Supplementary material for: Gestational Medication Use, Birth Conditions, and Early Postnatal Exposures for Childhood Asthma
Source: Hindawi journal article supplement (doi:10.1155/2012/913426), 2011-12-04
Supplement: f1 [file 913426.f1.pdf]

**Table S1. Environmental questions used in the nested case control study**

---

1. During your pregnancy, did you take any medication?

(1) None; (2) Yes

If yes, then:

(1) What kind of medication did you take?

- |                                  |                            |
|----------------------------------|----------------------------|
| (A) Anti-pyretics                | (B) Hypnotics              |
| (C) Gastro-intestinal medication | (D) Common cold medication |
| (E) Tocolysis                    | (F) Anti-emetics           |
| (G) Antibiotics                  | (H) Others                 |

(2) When did you start to take medication during your pregnancy?

- |                                                           |                                                          |
|-----------------------------------------------------------|----------------------------------------------------------|
| (A) 1 <sup>st</sup> trimester (pregnancy for 1-4 months)  | (B) 2 <sup>nd</sup> trimester (pregnancy for 5-7 months) |
| (C) 3 <sup>rd</sup> trimester (pregnancy for 8-10 months) |                                                          |

(3) For how long did you take the medication (the earliest kind)?

- |                       |               |
|-----------------------|---------------|
| (A) 0-3 days          | (B) 4-7 days  |
| (C) 1-2 weeks         | (D) 2-4 weeks |
| (D) More than 1 month |               |

2. During your pregnancy, did you take any Chinese herbal medication?

(2) None; (2) Yes

If yes, then:

(1) What kind of Chinese herbal medication did you take?

- |                                      |                 |
|--------------------------------------|-----------------|
| (A) Bazhen Tang                      | (B) Si Wu Tang  |
| (C) Ginseng                          | (D) Coptis root |
| (E) Anti-abortion herbs (An-Tai-Yin) | (F) Unknown     |
| (G) Others                           |                 |

(2) When did you start to take Chinese herbal medication during your pregnancy?

- |                                                           |                                                          |
|-----------------------------------------------------------|----------------------------------------------------------|
| (A) 1 <sup>st</sup> trimester (pregnancy for 1-4 months)  | (B) 2 <sup>nd</sup> trimester (pregnancy for 5-7 months) |
| (C) 3 <sup>rd</sup> trimester (pregnancy for 8-10 months) |                                                          |

months)

(3) What is the frequency of taking Chinese herbal medication during your pregnancy?

- (A) <1 time/month (B) At least 1 time/month  
(C) 1-3 times/week (D) 4-6 times/week  
(E) At least 1 time daily

(4) What is the duration of taking Chinese herbal medication during your pregnancy?

- (A) <3 days (B) 3-7 days  
(C) 1-2 weeks (D) 2-4 weeks  
(E) more than 1 month

3. What is the mode of delivery when you give birth to this child

(1) Vaginal delivery; (2) Cesarean section.

4. During the process of delivery, did your doctor use forceps during vaginal delivery?

(1) None; (2) Yes

5. What was the birth weight of your child? \_\_\_\_\_gram

6. What was the gestational age while you give birth to this child? \_\_\_\_\_weeks

7. Have you exclusively breastfed your child?

(1) None; (2) Yes

If yes, then for how long?

- (1) Less than one month (2) 1-2 month  
(3) 2-4 months (4) 4-6 months  
(5) 6-8 months (6) 8-10 months  
(7) 10-12 months (8) More than 1 year

8. How many times did your child have respiratory tract infection before he (she) was 1 year old ?

(1) None; (2) 1-2 times; (3) 3-4 times; (4) 5-6 times; (5) more than 6 times.

9. Did your child hospitalize due to respiratory tract infection before he (she) was 1 year old ?

(1) None; (2) Yes

10. Did your child attend daycare center before he (she) enter elementary school?

(1) None; (2) Yes

If yes, when did your child attend daycare center?

(A) 0-4 months

(B) 4-6 months

(C) 6-12 months

(D) 1-2 years-old

(E) 2-3 years-old

(F) 3-4 years-old

(G) 4-7 years-old

(H) More than 7 years-old

11. How many children other than your child did the main caregiver care before your child was 1 year old ?

(1) None

(2) 1 child

(3) 2 children

(4) 3 children

(5) More than 3 children

---

**Table S2. The representativeness of our control groups as compared to original control population.**

| Characteristics                           | Control |      | Control frequency corrected for sampling |      | Difference between control and original population<br>P value |
|-------------------------------------------|---------|------|------------------------------------------|------|---------------------------------------------------------------|
|                                           | (N=386) |      | (N=4312)                                 |      |                                                               |
|                                           | N       | %    | N‡                                       | %    |                                                               |
| <b>Sex</b>                                |         |      |                                          |      | 0.99                                                          |
| <b>Girls</b>                              | 168     | 43.5 | 1876                                     | 43.5 |                                                               |
| <b>Boys</b>                               | 218     | 56.5 | 2436                                     | 56.5 |                                                               |
| <b>Parental education, yr†</b>            |         |      |                                          |      | 0.001                                                         |
| <b>≤12</b>                                | 264     | 69.1 | 2603                                     | 60.4 |                                                               |
| <b>13~15</b>                              | 69      | 18.1 | 888                                      | 20.6 |                                                               |
| <b>≥16</b>                                | 49      | 12.8 | 821                                      | 19.0 |                                                               |
| <b>Family history of asthma†</b>          |         |      |                                          |      | 0.79                                                          |
| <b>No</b>                                 | 372     | 97.9 | 4212                                     | 97.7 |                                                               |
| <b>Yes</b>                                | 8       | 2.1  | 100                                      | 2.3  |                                                               |
| <b>Family history of atopy*†</b>          |         |      |                                          |      | 0.15                                                          |
| <b>No</b>                                 | 274     | 72.1 | 3252                                     | 75.4 |                                                               |
| <b>Yes</b>                                | 106     | 27.9 | 1060                                     | 24.6 |                                                               |
| <b><i>In utero</i> maternal smoking †</b> |         |      |                                          |      | 0.01                                                          |
| <b>No</b>                                 | 382     | 99.0 | 4162                                     | 96.5 |                                                               |
| <b>Yes</b>                                | 4       | 1.0  | 150                                      | 3.5  |                                                               |

\*Atopy is defined as allergic rhinitis or atopic eczema.

†Number of subjects does not add up to total N because of missing data.

**Table S3. The representativeness of our cases as compared to original cases in baseline cohort.**

| Characteristics                           | Case    |      | Original cases |      | Difference between control and original population |
|-------------------------------------------|---------|------|----------------|------|----------------------------------------------------|
|                                           | (N=193) |      | (N=287)        |      | P value                                            |
|                                           | N       | %    | N              | %    |                                                    |
| <b>Sex</b>                                |         |      |                |      | 0.59                                               |
| <b>Girls</b>                              | 84      | 43.5 | 132            | 45.9 |                                                    |
| <b>Boys</b>                               | 109     | 56.5 | 155            | 54.1 |                                                    |
| <b>Parental education, yr†</b>            |         |      |                |      | 0.01                                               |
| <b>≤12</b>                                | 116     | 61.7 | 174            | 60.6 |                                                    |
| <b>13~15</b>                              | 41      | 21.8 | 93             | 32.5 |                                                    |
| <b>≥16</b>                                | 31      | 16.5 | 20             | 6.9  |                                                    |
| <b>Family history of asthma†</b>          |         |      |                |      | 0.37                                               |
| <b>No</b>                                 | 165     | 89.2 | 263            | 91.8 |                                                    |
| <b>Yes</b>                                | 20      | 10.8 | 24             | 8.2  |                                                    |
| <b>Family history of atopy*†</b>          |         |      |                |      | 0.25                                               |
| <b>No</b>                                 | 101     | 54.6 | 172            | 59.9 |                                                    |
| <b>Yes</b>                                | 84      | 45.4 | 115            | 40.1 |                                                    |
| <b><i>In utero</i> maternal smoking †</b> |         |      |                |      | 0.06                                               |
| <b>No</b>                                 | 189     | 97.9 | 271            | 94.5 |                                                    |
| <b>Yes</b>                                | 4       | 2.1  | 16             | 5.5  |                                                    |

\*Atopy is defined as allergic rhinitis or atopic eczema.

†Number of subjects does not add up to total N because of missing data.
